# Supplementary material for: Hatching of Globodera pallida Induced by Root Exudates Is Not Influenced by Soil Microbiota Composition
Source: Frontiers journal article supplement (doi:10.3389/fmicb.2020.536932), 2020-10-08
Supplement: Data_Sheet_1.PDF [file Data_Sheet_1.PDF]

**Supporting Information – Figure S1:** PCA on the physicochemical properties of the native agricultural soils. Colours (brown, red, blue and orange) indicate the selected NS (A, D, F and J).

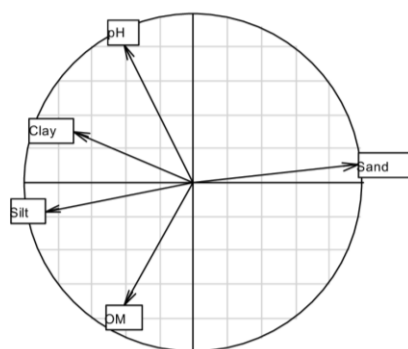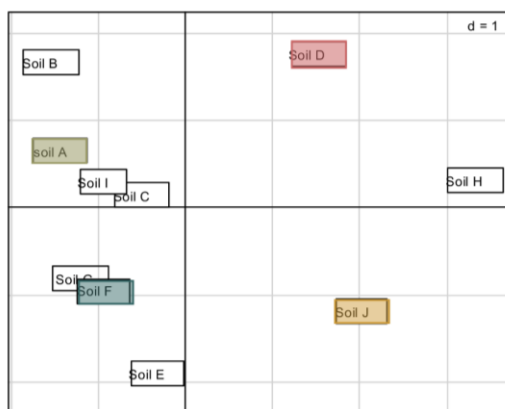

**Supporting Information – Figure S2:** Alpha diversity in NS and RS represented by the (A) bacterial / (C) fungal specific richness (i.e. observed ASV) and the diversity of (B) bacterial / (D) fungal species (i.e. Shannon index). Letters represent significant differences between soils for a given type of soil.

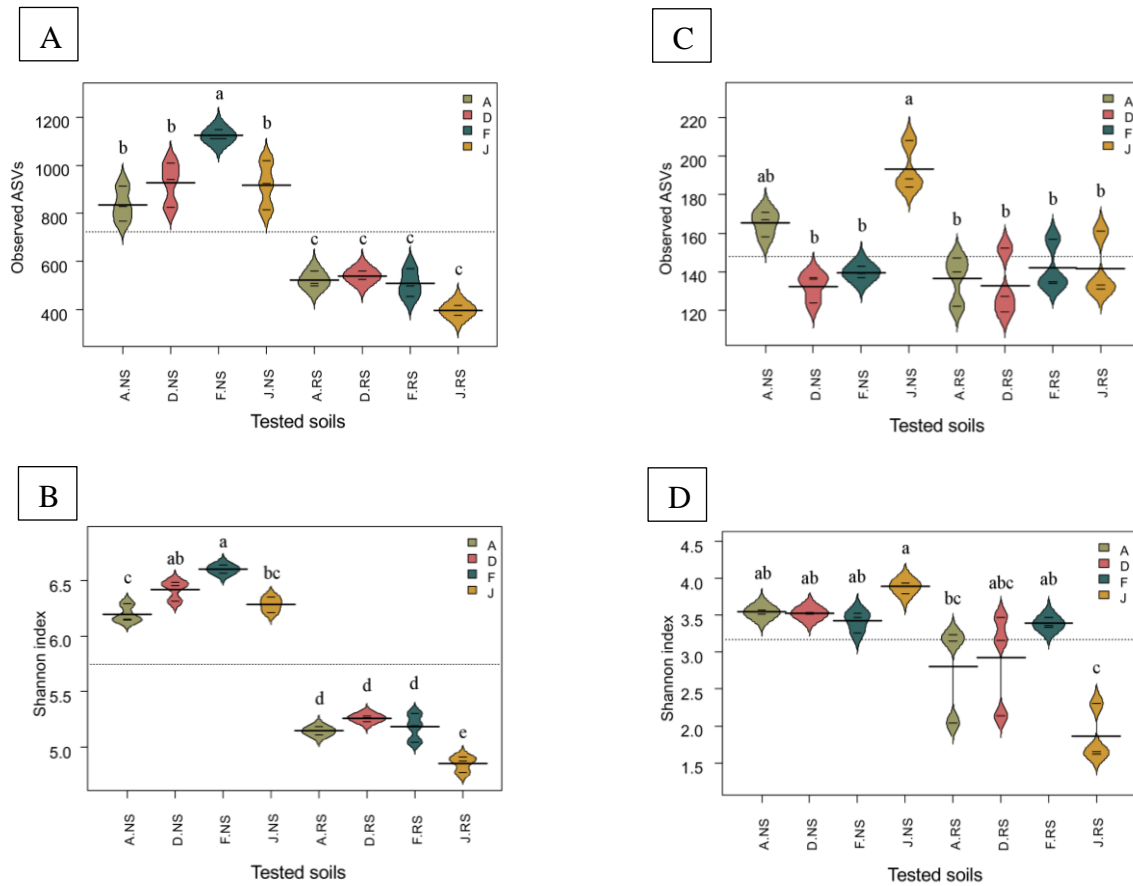

**Supporting Information – Table S1:** Statistical output of the ten most abundant bacterial genera. Numbers below each soil specify the statistical groups obtained from pairwise comparisons. Bold p-values indicate a significant difference (**A**) among NS and (**B**) among RS.

A

| Genus                           | P_value      | Soil A | Soil D | Soil F | Soil J |
|---------------------------------|--------------|--------|--------|--------|--------|
| <i>Acidibacter</i>              | <b>0.000</b> | 1      | 2      | 2      | 3      |
| <i>Arenimonas</i>               | <b>0.000</b> | 1      | 2      | 3      | 2      |
| <i>Bacillus</i>                 | <b>0.000</b> | 4      | 2      | 1      | 3      |
| <i>Candidatus_Alysiosphaera</i> | <b>0.000</b> | 2      | 3      | 1      | 1      |
| <i>Gaiella</i>                  | <b>0.000</b> | 3      | 2      | 1      | 1      |
| <i>Haliangium</i>               | <b>0.000</b> | 1      | 1      | 1      | 2      |
| <i>Pedomicrobium</i>            | 0.089        | 1      | 1      | 1      | 1      |
| <i>Pseudolabrys</i>             | <b>0.000</b> | 2      | 1      | 2      | 3      |
| <i>Reyranella</i>               | <b>0.000</b> | 2      | 1      | 23     | 3      |
| <i>Terrimonas</i>               | <b>0.000</b> | 2      | 1      | 2      | 1      |

B

| Genus                    | P_value     | Soil A | Soil D | Soil F | Soil J |
|--------------------------|-------------|--------|--------|--------|--------|
| <i>Arenimonas</i>        | <b>0.00</b> | 1      | 2      | 4      | 3      |
| <i>Brevundimonas</i>     | <b>0.00</b> | 1      | 2      | 1      | 1      |
| <i>Caulobacter</i>       | <b>0.00</b> | 1      | 1      | 2      | 2      |
| <i>Luteimonas</i>        | <b>0.03</b> | 1      | 1      | 1      | 1      |
| <i>Lysobacter</i>        | <b>0.00</b> | 2      | 3      | 2      | 1      |
| <i>Massilia</i>          | <b>0.01</b> | 1      | 12     | 1      | 2      |
| <i>Pedobacter</i>        | 0.07        | 1      | 1      | 1      | 1      |
| <i>Pseudarthrobacter</i> | 0.82        | 1      | 1      | 1      | 1      |
| <i>Pseudomonas</i>       | <b>0.00</b> | 2      | 1      | 2      | 2      |
| <i>Rhodanobacter</i>     | <b>0.00</b> | 3      | 1      | 2      | 2      |

**Supporting Information – Table S2:** Statistical output of the ten most abundant fungal genera.

Numbers below each soil specify the statistical groups obtained from pairwise comparisons.

Bold p-values indicate a significant difference (**A**) among NS and (**B**) among RS.

A

| Genus                   | P_value      | Soil A | Soil D | Soil F | Soil J |
|-------------------------|--------------|--------|--------|--------|--------|
| <i>Bionectria</i>       | <b>0.000</b> | 3      | 4      | 1      | 2      |
| <i>Chaetomium</i>       | <b>0.000</b> | 2      | 3      | 4      | 1      |
| <i>Cryptococcus</i>     | <b>0.000</b> | 2      | 1      | 3      | 4      |
| <i>Exophiala</i>        | <b>0.000</b> | 2      | 1      | 3      | 3      |
| <i>Fusarium</i>         | <b>0.000</b> | 3      | 1      | 1      | 2      |
| <i>Mortierella</i>      | <b>0.000</b> | 3      | 1      | 2      | 3      |
| <i>Pseudogymnoascus</i> | <b>0.000</b> | 2      | 1      | 1      | 2      |
| <i>Stachybotrys</i>     | <b>0.000</b> | 2      | 3      | 1      | 123    |
| <i>Trichoderma</i>      | <b>0.000</b> | 2      | 2      | 1      | 2      |
| <i>Verticillium</i>     | <b>0.000</b> | 4      | 3      | 2      | 1      |

B

| Genus                   | P_value      | Soil A | Soil D | Soil F | Soil J |
|-------------------------|--------------|--------|--------|--------|--------|
| <i>Acremonium</i>       | <b>0.022</b> | 2      | 2      | 12     | 1      |
| <i>Bionectria</i>       | <b>0.000</b> | 2      | 3      | 1      | 1      |
| <i>Chaetomium</i>       | <b>0.003</b> | 1      | 12     | 2      | 1      |
| <i>Cryptococcus</i>     | <b>0.000</b> | 2      | 1      | 3      | 23     |
| <i>Fusarium</i>         | <b>0.006</b> | 2      | 1      | 2      | 1      |
| <i>Mortierella</i>      | <b>0.003</b> | 12     | 12     | 1      | 2      |
| <i>Pseudogymnoascus</i> | 0.052        | 1      | 1      | 1      | 1      |
| <i>Stachybotrys</i>     | <b>0.000</b> | 1      | 2      | 1      | 12     |
| <i>Trichosporon</i>     | <b>0.000</b> | 2      | 1      | 3      | 1      |
| <i>Verticillium</i>     | <b>0.000</b> | 2      | 2      | 1      | 1      |

**Supporting Information – Figure S3:** Heat trees comparing bacterial taxa (genera which the abundance is higher than 50/10000) (**A**) between NS and (**B**) between RS. A coloured taxon (blue or red) indicates the presence of this taxon (at least in two replicates on three) into a given soil. Purple taxa are present (at least in two replicates on three) in the two compared soils. Unclassified genera were removed from the plot.

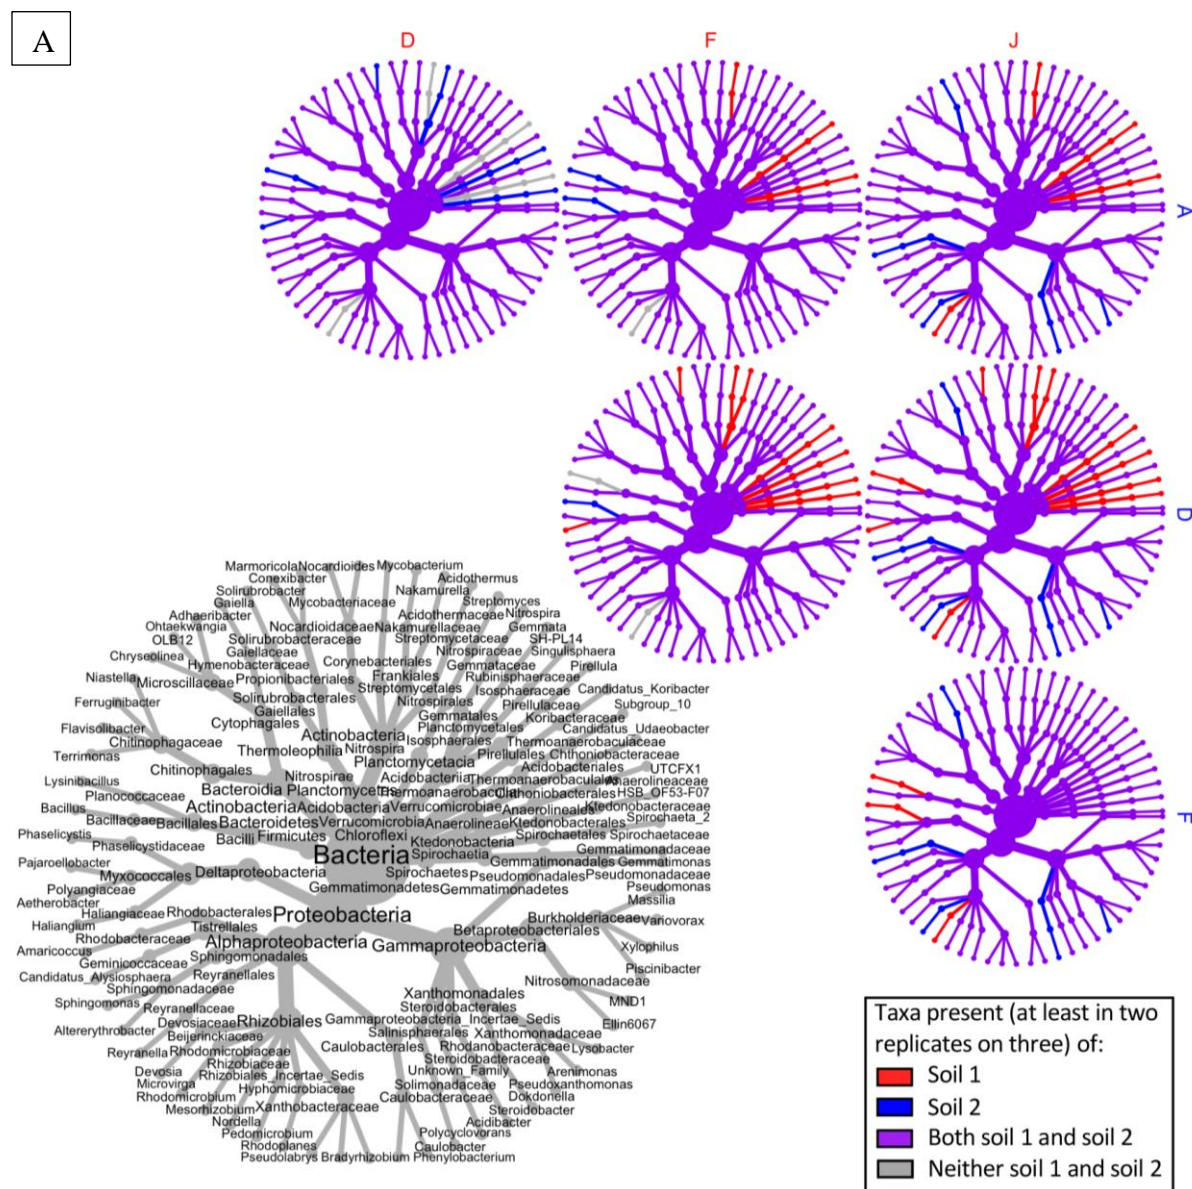

B

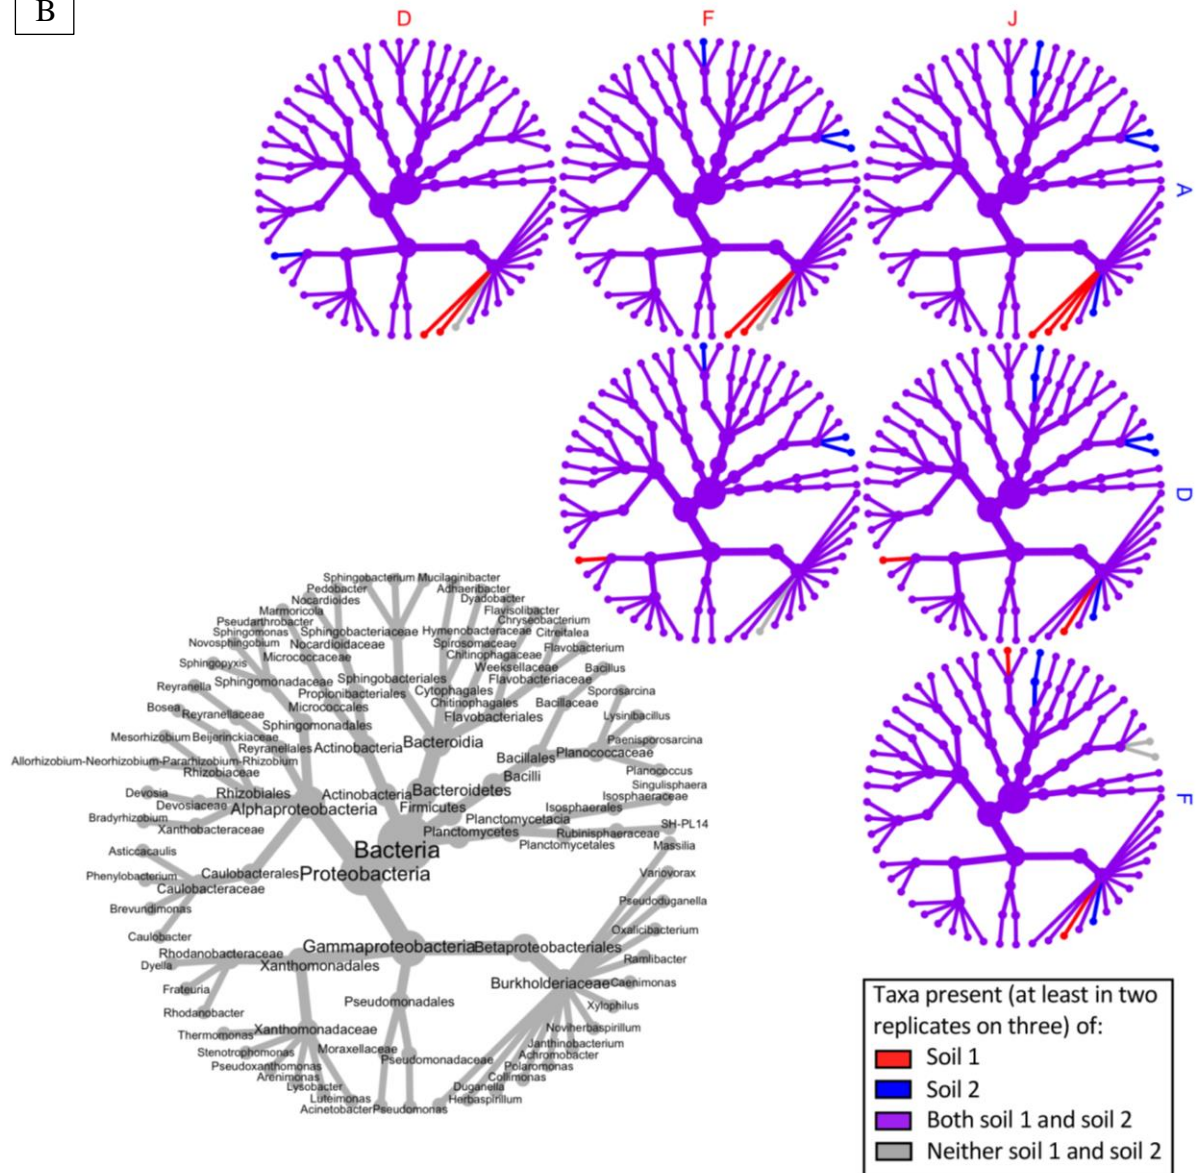

Note: Soil 1 is used for soils with red letters (i.e. D, F and J) and soil 2 is used for soils with blue letters (i.e. A, D, F).





B

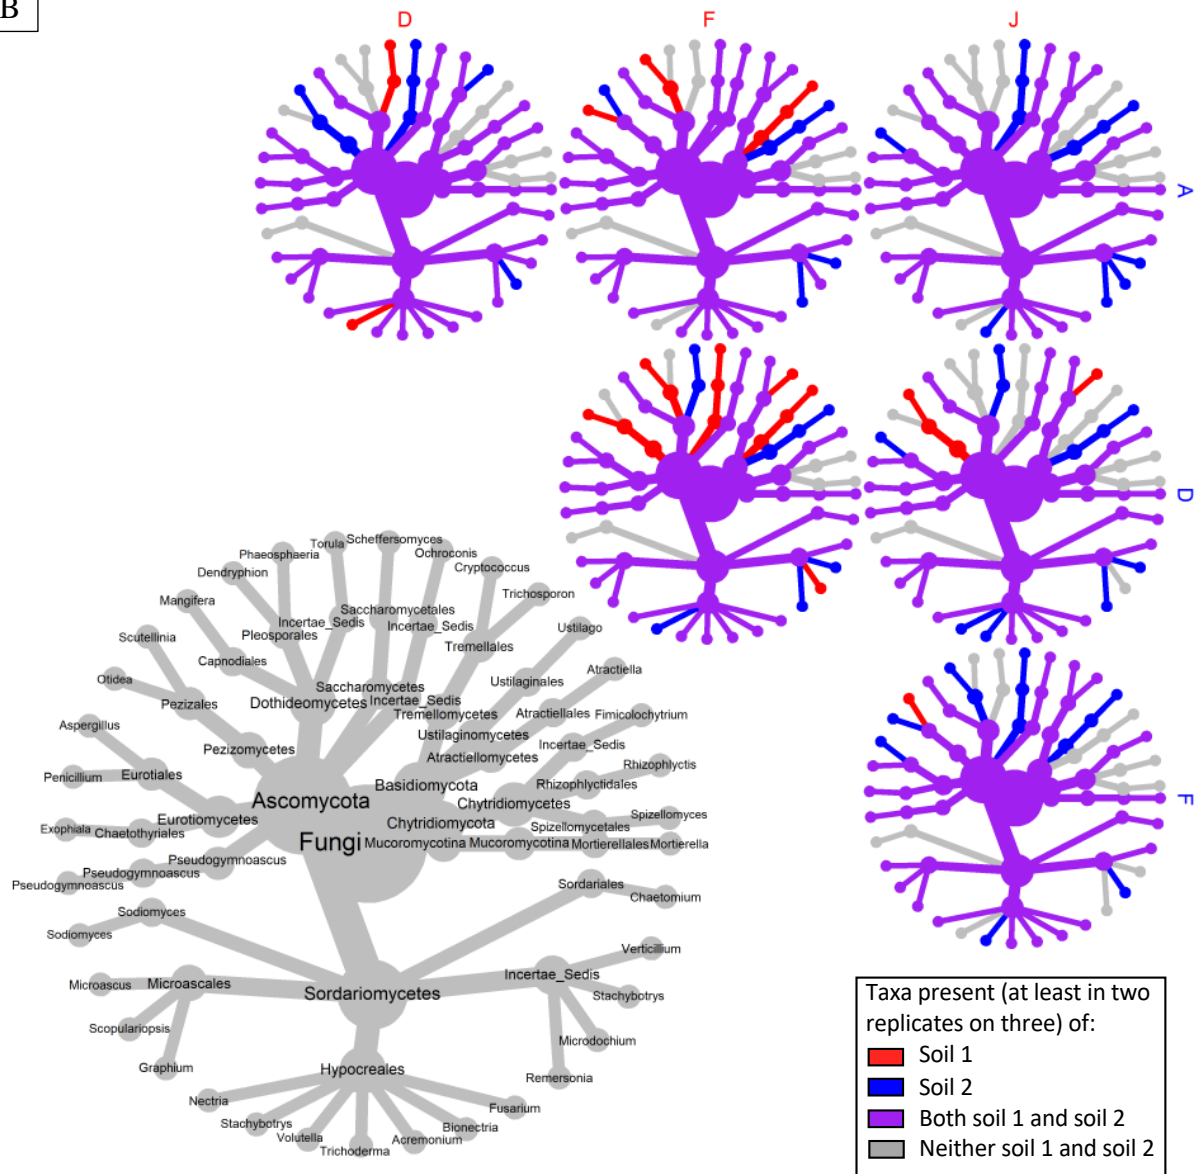

Note: Soil 1 is used for soils with red letters (i.e. D, F and J) and soil 2 is used for soils with blue letters (i.e. A, D, F).
